# Supplementary material
Source: publisher figshare collection journal article supplement (https://sage.figshare.com/ndownloader/files/13816955)
Supplement: Supplementary file 1 [file 13816955]

## Supplemental Material

**Table 1.** Multivariable regression to examine associations between environmental barriers domains and Leisure Interest Measure score for 51 participants

| Correlates with Leisure Interest Measure | R <sup>2</sup> | Adjusted R <sup>2</sup> | Unstandardized B (SE) | Standardized B | <i>P</i> |
|------------------------------------------|----------------|-------------------------|-----------------------|----------------|----------|
| Model                                    | 0.06           | 0.03                    |                       |                | 0.20     |
| Services and Assistance Frequency        |                |                         | -0.97 (1.62)          | 0.18           | 0.55     |
| Services and Assistance Magnitude        |                |                         | 0.81 (2.82)           | 0.09           | 0.77     |

**Table 2.** Spearman correlation coefficients for associations between environmental barriers domains and physical impairment and function, cognitive, and emotional factors

| CHIEF Domain            | CMSA-Arm     | CMSA-Hand     | CMSA-Leg      | CMSA-Foot     | CAHAI         | 5-Meter Walk   | 6MWT          | Mini-BESTest  | MoCA          | CESD-10       |
|-------------------------|--------------|---------------|---------------|---------------|---------------|----------------|---------------|---------------|---------------|---------------|
| <i>Frequency</i>        |              |               |               |               |               |                |               |               |               |               |
| Attitude and Support    | 0.09<br>(51) | -0.04<br>(51) | 0.16<br>(51)  | 0.04<br>(50)  | -0.05<br>(51) | -0.005<br>(51) | 0.28*<br>(50) | 0.004<br>(50) | 0.17<br>(51)  | 0.50*<br>(51) |
| Physical and Structural | 0.17<br>(51) | 0.07<br>(51)  | -0.01<br>(51) | 0.21<br>(50)  | 0.11<br>(51)  | 0.14<br>(51)   | 0.23<br>(50)  | 0.11<br>(50)  | 0.07<br>(51)  | 0.50*<br>(51) |
| Policy                  | 0.17<br>(51) | 0.19<br>(51)  | 0.16<br>(51)  | 0.20<br>(50)  | 0.22<br>(51)  | 0.16<br>(51)   | 0.21<br>(50)  | 0.17<br>(50)  | 0.10<br>(51)  | 0.17<br>(51)  |
| Services and Assistance | 0.07<br>(51) | 0.03<br>(51)  | 0.06<br>(51)  | 0.18<br>(50)  | 0.09<br>(51)  | 0.11<br>(51)   | 0.03<br>(50)  | -0.11<br>(50) | -0.08<br>(51) | 0.27*<br>(51) |
| Work and School         | 0.11<br>(51) | 0.13<br>(51)  | 0.07<br>(51)  | 0.14<br>(50)  | 0.10<br>(51)  | 0.04<br>(51)   | 0.22<br>(50)  | 0.18<br>(50)  | -0.05<br>(51) | 0.30*<br>(51) |
| <i>Magnitude</i>        |              |               |               |               |               |                |               |               |               |               |
| Attitude and Support    | 0.06<br>(51) | -0.06<br>(51) | 0.17<br>(51)  | -0.02<br>(50) | -0.07<br>(51) | -0.03<br>(51)  | 0.19<br>(50)  | -0.04<br>(50) | 0.14<br>(51)  | 0.47*<br>(51) |
| Physical and Structural | 0.11<br>(51) | 0.02<br>(51)  | -0.08<br>(51) | 0.06<br>(50)  | 0.02<br>(51)  | 0.16<br>(51)   | 0.22<br>(50)  | 0.13<br>(50)  | 0.05<br>(51)  | 0.38*<br>(51) |
| Policy                  | 0.23<br>(51) | 0.26*<br>(51) | 0.19<br>(51)  | 0.21<br>(50)  | 0.27*<br>(51) | 0.24*<br>(51)  | 0.32*<br>(50) | 0.25<br>(50)  | 0.19<br>(51)  | 0.14<br>(51)  |
| Services and Assistance | 0.07<br>(51) | 0.06<br>(51)  | 0.07<br>(51)  | 0.17<br>(50)  | 0.09<br>(51)  | 0.11<br>(51)   | 0.02<br>(50)  | -0.07<br>(50) | -0.06<br>(51) | 0.20<br>(51)  |
| Work and School         | 0.08<br>(51) | 0.07<br>(51)  | 0.01<br>(51)  | 0.06<br>(50)  | 0.04<br>(51)  | -0.02<br>(51)  | 0.14<br>(50)  | 0.13<br>(50)  | -0.12<br>(51) | 0.35*<br>(51) |

Values are rho

\* $P < 0.10$

Abbreviations: CMSA – Chedoke-McMaster Stroke Assessment impairment inventory score; CAHAI – Chedoke Arm and Hand Activity Inventory; 6MWT – 6-Minute Walk Test; Mini-BESTest – Mini-Balance Evaluative Systems Test; MoCA – Montreal Cognitive Assessment; CESD-10 – Centre for Epidemiological Studies Depression scale

**Table 3.** Multivariable regression to examine associations between Frequency of Attitude and Support barriers and Centre for Epidemiological Studies Depression-10 scale score and 6-Minute Walk Test distance for 50 participants

| Correlates with Frequency of Attitude and Support      | R <sup>2</sup> | Adjusted R <sup>2</sup> | Unstandardized B (SE) | Standardized B | P      |
|--------------------------------------------------------|----------------|-------------------------|-----------------------|----------------|--------|
| Model                                                  | 0.21           | 0.17                    |                       |                | 0.004* |
| Centre for Epidemiological Studies Depression Scale-10 |                |                         | 0.05 (0.02)           | 0.40           | 0.004* |
| 6-Minute Walk Test Distance                            |                |                         | 0.001 (0.001)         | 0.015          | 0.27   |

\* $P < 0.05$

**Table 4.** Multivariable regression to examine associations between Magnitude of Policy barriers and Chedoke-McMaster Stroke Assessment Hand impairment score, Chedoke Arm and Hand Activity Inventory-7, self-paced gait speed, and 6-Minute Walk Test distance for 50 participants

| Correlates with Magnitude of Policy                | R <sup>2</sup> | Adjusted R <sup>2</sup> | Unstandardized B (SE) | Standardized B | P    |
|----------------------------------------------------|----------------|-------------------------|-----------------------|----------------|------|
| Model                                              | 0.15           | 0.08                    |                       |                | 0.11 |
| Chedoke-McMaster Stroke Assessment Hand Impairment |                |                         | 0.06 (0.10)           | 0.19           | 0.56 |
| Chedoke Arm and Hand Activity Inventory-7          |                |                         | -0.01 (0.01)          | -0.27          | 0.56 |
| Self-paced gait speed                              |                |                         | -0.42 (0.46)          | -0.25          | 0.46 |
| 6-Minute Walk Test distance                        |                |                         | 0.003 (0.001)         | 0.61           | 0.02 |
